# Supplementary material for: Continuously fabricated transparent conductive polycarbonate/carbon nanotube nanocomposite films for switchable thermochromic applications
Source: Royal Society of Chemistry journal article supplement (doi:10.1039/c8tc01779d), 2018-01-01
Supplement: c8tc01779d1.pdf [file c8tc01779d1.pdf]

Supporting Information

**Continuously Fabricated Transparent Conductive Polycarbonate/Carbon  
Nanotube Nanocomposite Film for Switchable Thermochromic Applications**

Bing Zhou,<sup>1</sup> Yahong Li,<sup>1</sup> Guoqiang Zheng,<sup>1,\*</sup> Kui Dai,<sup>1</sup> Chuntai Liu,<sup>1,\*</sup>

Yong Ma,<sup>2,3</sup> Jiaoxia Zhang,<sup>2,4</sup> Ning Wang,<sup>5</sup> Changyu Shen,<sup>1</sup> and Zhanhu Guo<sup>2,\*</sup>

<sup>1</sup>College of Materials Science and Engineering, The Key Laboratory of Material Processing and Mold of Ministry of Education, Zhengzhou University, China

<sup>2</sup>Integrated Composites Laboratory (ICL), Department of Chemical & Biomolecular Engineering, University of Tennessee, Knoxville, TN 37996, USA

<sup>3</sup>College of Materials Science and Engineering, Shandong University of Science and Technology, Qingdao 266590, China

<sup>4</sup>School of Material Science and Engineering, Jiangsu University of Science and Technology, Zhenjiang, Jiangsu, 212003 China

<sup>5</sup> State Key Laboratory of Marine Resource Utilization in South China Sea, Hainan University, Haikou 570228, P.R. China

\*: Correspondence authors

Email address: [gqzheng@zzu.edu.cn](mailto:gqzheng@zzu.edu.cn) (G. Z.)

[ctlou@zzu.edu.cn](mailto:ctlou@zzu.edu.cn) (C. L.)

[zguo10@utk.edu](mailto:zguo10@utk.edu) (Z. G.)

## Supporting Videos

**Video S1:** The home-made R2R spraying equipment movement process.

## Supporting Figures

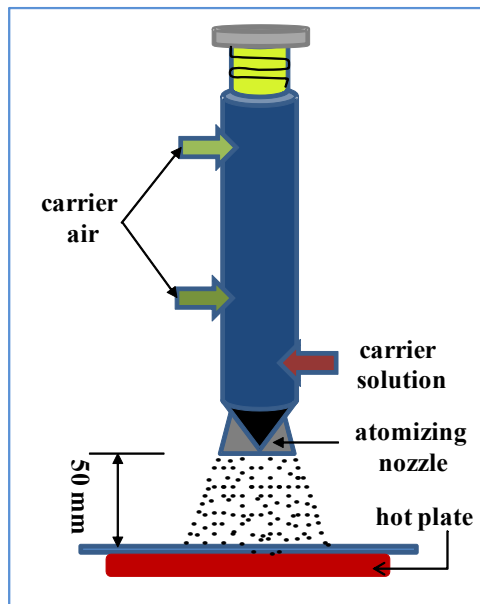

**Fig. S1.** Schematic diagram of the spraying process.

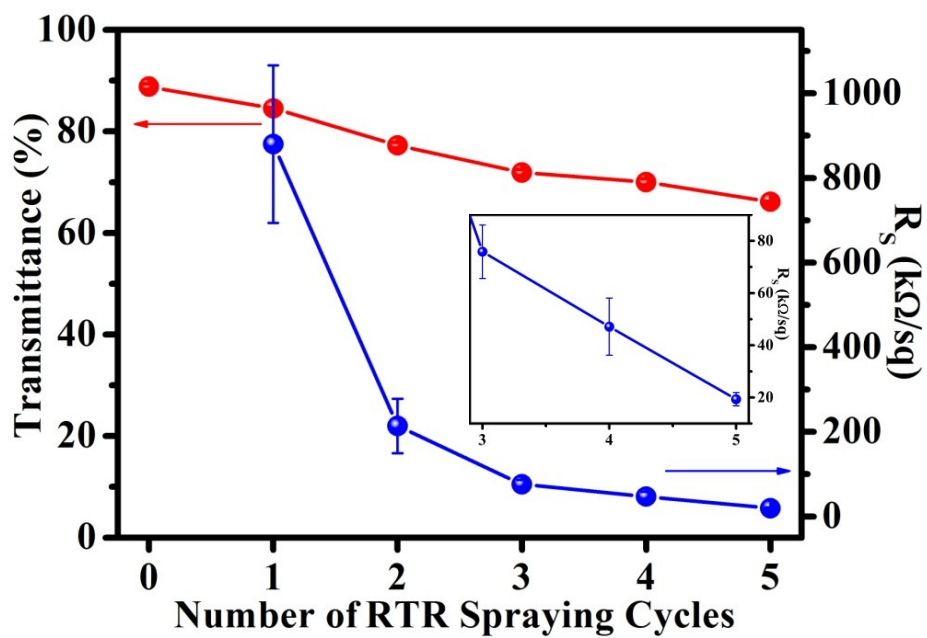

**Fig. S2.** Sheet resistance and transmittance (at 550 nm) versus the number of R2R spraying cycles for  $\text{PM}_x\text{S}_0$ .

Fig. S2 shows the transmittances at 550 nm and sheet resistances of  $PM_xS_0$  as a function of the increasing R2R spraying cycles of MWNTs dispersion. Exactly, the sheet resistances and transmittance are monotonically decreased (i.e.,  $R_s$ , from 880 k $\Omega$ /sq to 19.33 k $\Omega$ /sq, and  $T$ , from 90.0 % to 65.7%) with increasing the spraying cycles of MWNTs dispersion, which indicate that there is a trade-off between the  $R_s$  and  $T$ .

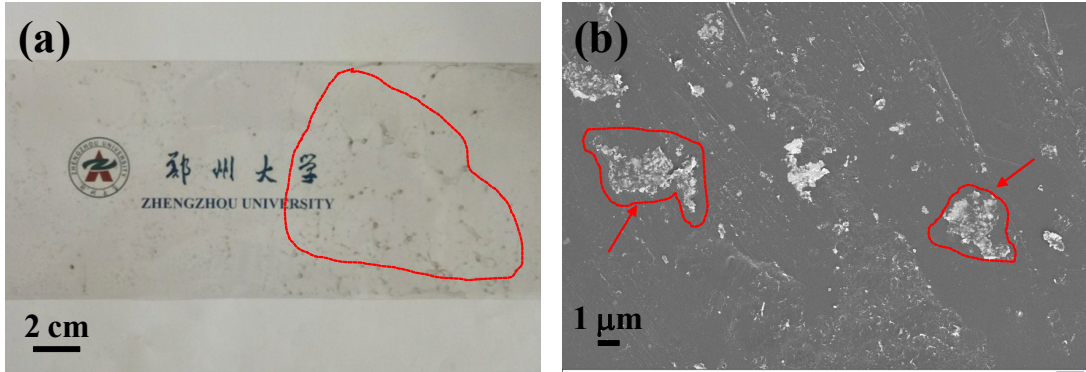

**Fig. S3.** Photograph of  $PM_0S_1$  (a) and corresponding SEM image (b).

From this photograph Fig. S3, a large number of black spots appear on the surface of PC film. In other words, SWNT can't be evenly sprayed on the PC surface. From the corresponding SEM images, many large carbon nanotube aggregates appear on the surface of the PC film (shown by arrows in Fig. S3b).

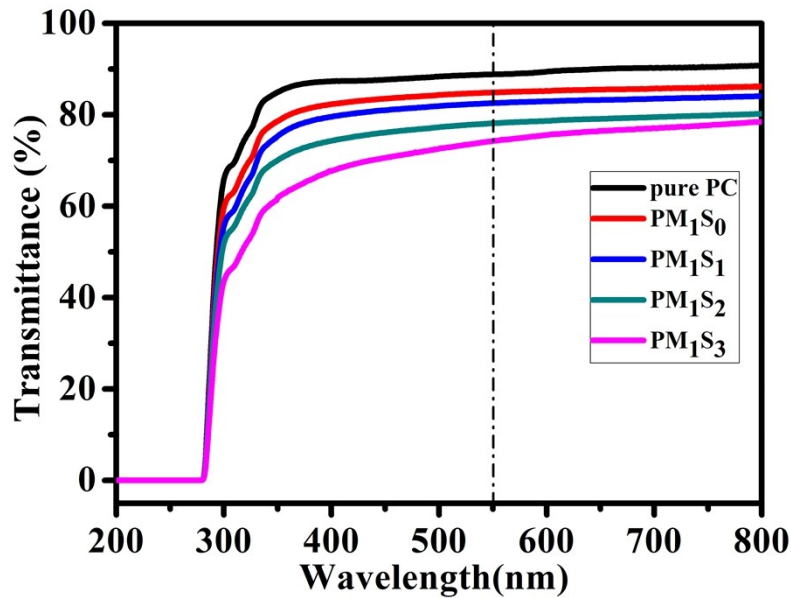

**Fig. S4.** Optical transmittance spectra of pure PC and  $\text{PM}_1\text{S}_y$ .

Fig. S4 shows the optical transmittance spectra of pure PC and  $\text{PM}_1\text{S}_y$ . The optical transmittance of PC film is approximately 90% in the wavelength range of 400–800 nm. Moreover, within the spectrum range from 400 to 800 nm, although  $\text{PM}_1\text{S}_y$  transparency is found to be gradually reduced with increasing the number of R2R spraying cycle of SWNTs dispersion. However, reduced amplitude of transparency is very small.

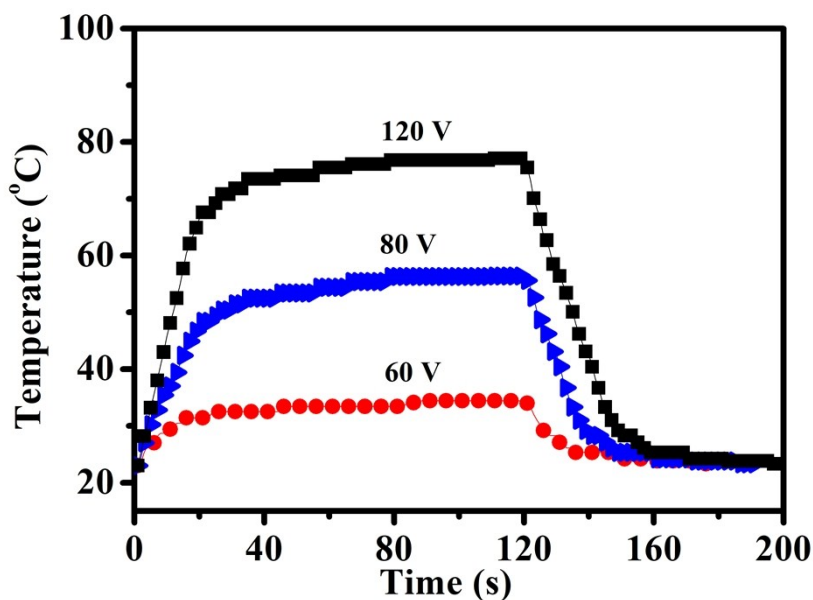

**Fig. S5.** Temperature–time curves of  $\text{PM}_1\text{S}_1$  at voltages of 60, 80 and 120 V.

Fig. S5 demonstrates the temperature–time curves of  $\text{PM}_1\text{S}_1$  at different voltages. On the whole, when the voltage is supplied to  $\text{PM}_1\text{S}_1$ , the temperature of  $\text{PM}_1\text{S}_1$  increases drastically and reaches a maximum. It quickly returns to the original room temperature after removal of the voltage.

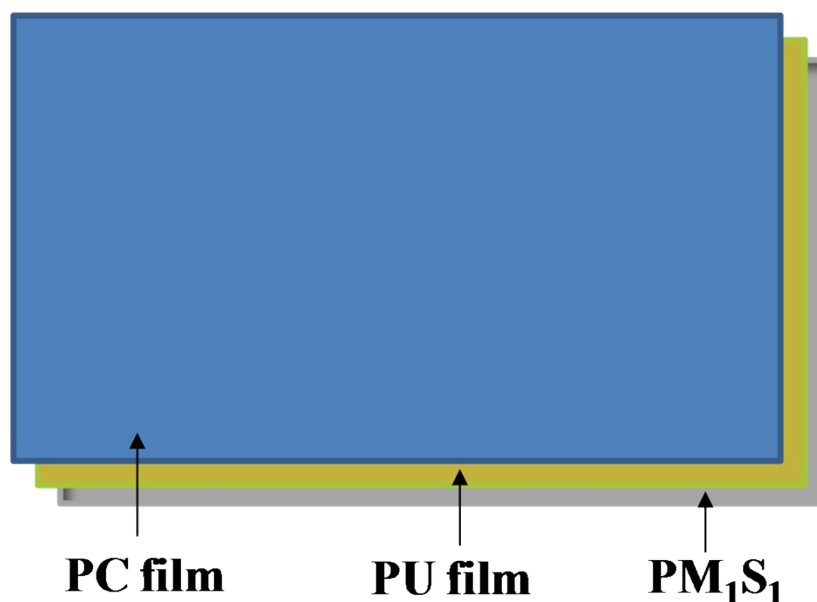

**Fig. S6.** The sandwiched PM<sub>1</sub>S<sub>1</sub>/PU/PC composite film.

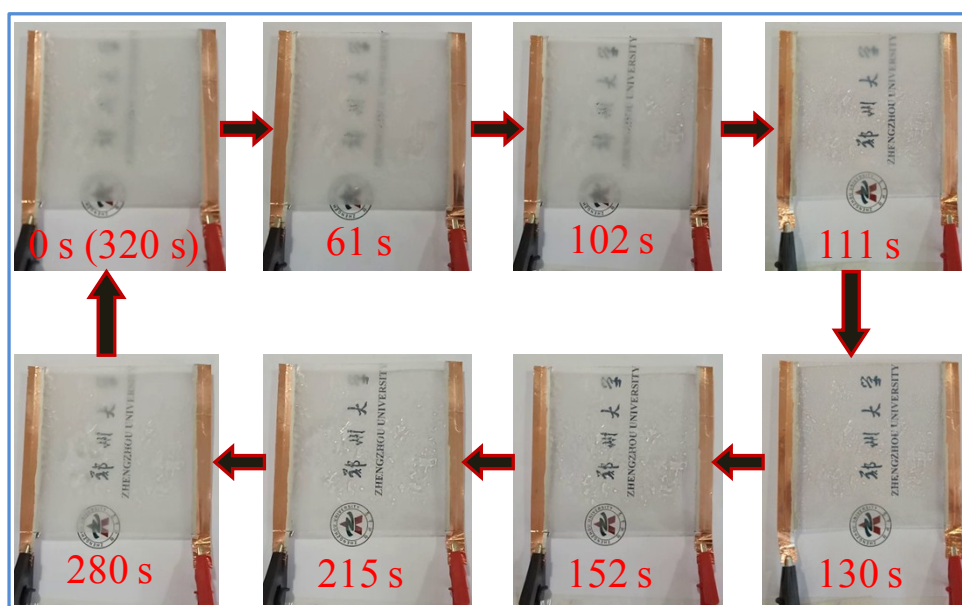

**Fig. S7.** Snapshots of switchable transparency process of composite film with applied voltage of 120 V.

Fig. S7 shows the opaque-to-transparent transition process of PM<sub>1</sub>S<sub>1</sub>/PU/PC composite film at voltage of 120 V. The composite film is initially opaque (0 s), while it gradually turns transparent after the voltage is applied (0 s–130 s). Then, it gradually returns to opaque state after turning off the voltage (130 s–320 s). The whole process is performed in the air environment.

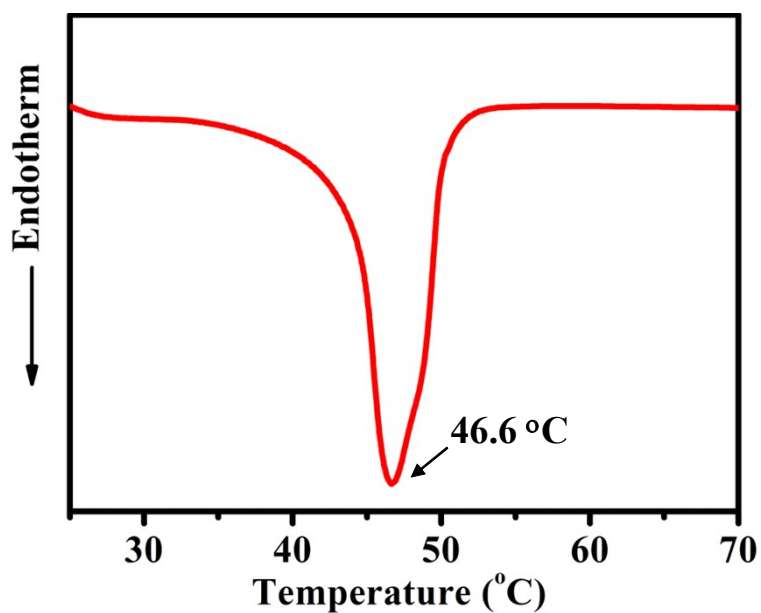

**Fig. S8.** DSC curve of PU film.

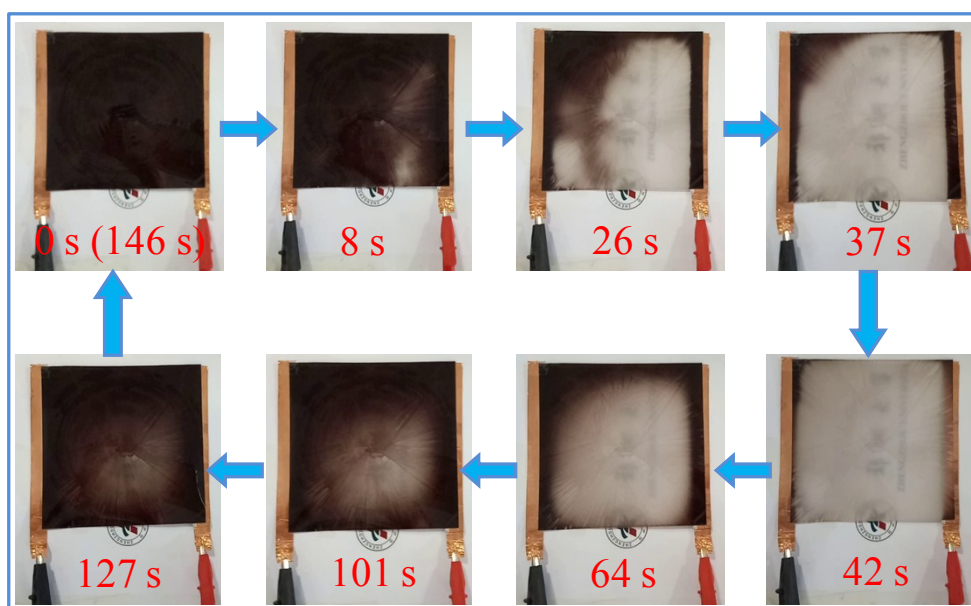

**Fig. S9.** Snapshots of color-changing process of composite film with applied voltage of 120 V.

Fig. S9 shows the color-changing process of  $\text{PM}_1\text{S}_1$ /thermochromic ink/PC composite film at voltage of 120 V. The composite film is initially black (0 s), while it gradually turns from black to white after the voltage is applied (0 s–42 s). Then, it gradually returns to their initial color after turning off the voltage (42 s–146 s). The whole process is performed in the air environment.

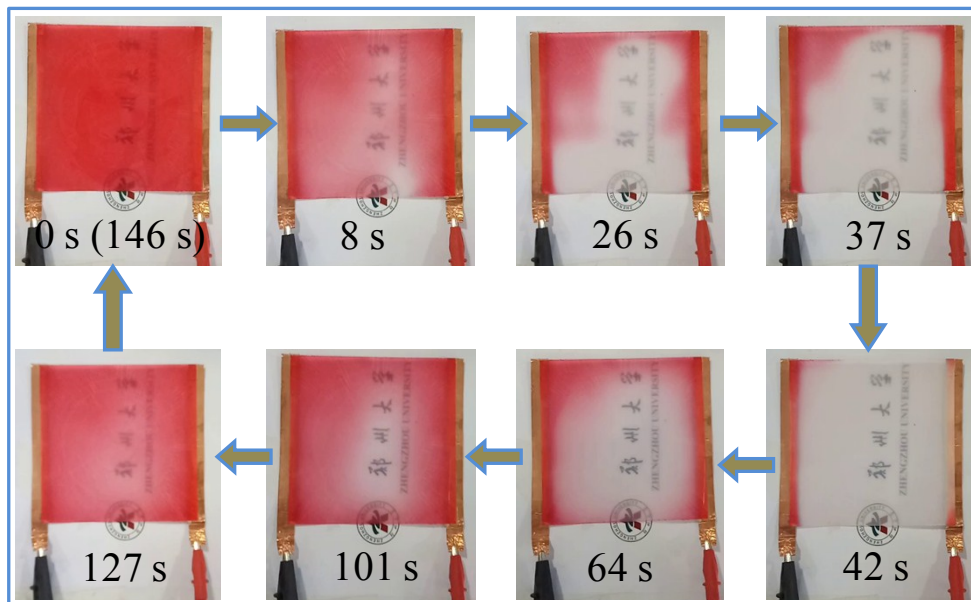

**Fig. S10.** Snapshots of color-changing process of composite film with applied voltage of 120 V.

Fig. S10 shows the color-changing process of  $\text{PM}_1\text{S}_1$ /thermochromic ink/PC composite film at voltage of 120 V. The composite film is initially red (0 s), while it gradually turns from red to white after the voltage is applied (0 s–42 s). Then, it gradually returns to their initial color after turning off the voltage (42 s–146 s). The whole process is performed in the air environment.
